# Supplementary material for: Hypoglycemic potential of whole green tea: water-soluble green tea polysaccharides combined with green tea extract delays digestibility and intestinal glucose transport of rice starch
Source: Royal Society of Chemistry journal article supplement (doi:10.1039/c8fo01936c), 2019-01-01
Supplement: c8fo01936c1.pdf [file c8fo01936c1.pdf]

**Hypoglycemic potential of whole green tea: 1. Water soluble green tea polysaccharides combined with green tea extract delayed digestibility and intestinal glucose transport of rice starch**

<Supplementary data>

Table. Four kinds of epicatechin content in aqueous fraction after *in vitro* digestion (µg/mL)

| Sample              | EGC    | EC    | EGCG  | ECG   | Total |
|---------------------|--------|-------|-------|-------|-------|
| GTE                 | 64.4   | 24.3  | 64.9  | 13.9  | 167.5 |
| Rice starch         | < LOD* | < LOD | < LOD | < LOD | < LOD |
| Rice starch+GTE     | 4.48   | 12.74 | 23.14 | 20.06 | 60.42 |
| Rice starch+CTP     | < LOD  | < LOD | < LOD | < LOD | < LOD |
| Rice starch+GTE+CTP | 5.84   | 12.68 | 22.88 | 20.11 | 61.52 |

\*below the limit of detection (LOD) < 3.0 µg/mL
